# Supplementary material
Source: Research Square preprint supplement (doi:10.21203/rs.3.rs-10309041/v1)
Supplement: Supplementary file 1 [file d877fcb498b2c6daecc42418.docx]

# Appendix A. The Cambridge Dialogue Analysis Scheme (CDAS) code descriptions

*Table A1* The Cambridge Dialogue Analysis Scheme (CDAS) code descriptions

| **Codes** | **Descriptions** |
| --- | --- |
| Elaboration Invitation (ELI) | Invites others to build on, evaluate, or clarify prior contributions. Excludes unseen work or procedural follow-ups. |
| Elaboration (EL) | Builds on or adds new ideas/perspectives to earlier contributions. Includes brief but meaningful elaborations or related ideas. |
| Invitation for Reasoning (IRE) | Asks for explanation, justification, speculation, or prediction (e.g. “Why?”, “What if...?”). Excludes simple answer requests. |
| Reasoning (RE) | Provides reasons, explanations, or evidence for a view. Includes analogies, distinctions, and justified speculations. |
| Co-ordination Invitation (CI) | Invites comparison, synthesis, or resolution of two or more ideas. |
| Simple Co-ordination (SC) | Summarizes or compares ideas (own or others’) without giving reasons. |
| Reasoned Co-ordination (RC) | Compares or integrates ideas with justification or evidence. Includes counter-arguments and reasoned agreement. |
| Agreement (A) | Explicit agreement or acceptance (e.g., “Yes”, “I agree”). Includes paraphrasing or repetition to signal agreement. |
| Querying (Q) | Challenges or disagrees with a statement. Includes verbal disagreement, sarcasm, or questioning. |
| Reference Back (RB) | Refers to prior class knowledge, shared experiences, or earlier activities. |
| Reference to Wider Context (RW) | Links current learning to broader contexts (e.g. real-world examples, outside expertise). |
| Other Invitation (OI) | All other verbal invitations (e.g. ideas, opinions, closed/open questions, calculations). Excludes non-verbal prompts. |
| Uncoded (UC) | When none of the above codes apply |

# Appendix B. Rating framework with evidence

*Table B1* Rating framework with evidence: Participant A

| **Dimension** | **Level** | **Evidence (verbatim excerpt)** |
| --- | --- | --- |
| Prior knowledge of coding | Strong | Use dialogue coding and understand relevant research |
| Prior knowledge of AI | Moderate | Use LLMs in daily life |
| Positionality (human-centred) | Strong | “But I'm not sure whether it's reliable or not, so I… so that put me into a position that I need to, like, critically evaluate the response.” “I… don’t think I’m… trying to adjust that model, but I’m testing the model…” “Because I think we were just testing the model rather than adjusting it…” |
| Coding Improvement[[1]](#footnote-1) | Moderate | + .125 + .122 |
| Subjectivity of AI assistant’s evaluation | Strong | “I don't know the reliability between my answer and the GPT's answer, but I… but from my experience, like, the reliability between two humans are…” |
| Trust | Weak | “No, I think I'm just basically… like I said before, I didn't, like, 100% trust that response, so I need to double check.” “I always worry about that reliability question…” |
| Interaction pattern | Weak | Only coding script input |

*Table B2* Rating framework with evidence: Participant B

| **Dimension** | **Level** | **Evidence (verbatim excerpt)** |
| --- | --- | --- |
| Prior knowledge of coding | Strong | Use dialogue coding and understand relevant research |
| Prior knowledge of AI | Strong | Use LLMs in daily life and research |
| Positionality (human-centred) | Strong | “I do view AI as another perspective who is equal with me… someone supporting my own reasoning.” “Its reasoning is authentic.” |
| Coding improvement | Weak | + .019 + .150 |
| Subjectivity of AI assistant's evaluation | Strong | “I forgot about the numbers you gave.” |
| Trust | Weak | The confirmation seems to be fake. “No, it's just an immediate feeling… like your mom is bragging something about you in front of a group of relatives.” “I may discuss this with him or her, but I didn't… really have a motivation to discuss this with an AI.” |
| Interaction pattern | Weak | Only coding script input |

*Table B3* Rating framework with evidence: Participant C

| **Dimension** | **Level** | **Evidence (verbatim excerpt)** |
| --- | --- | --- |
| Prior knowledge of coding | Strong | Use dialogue coding and understand relevant research |
| Prior knowledge of AI | Strong | Use LLMs in daily life and research |
| Positionality (human-centred) | Strong–Moderate | “More like a collaboration process.” “I can make the final decision based on my own coding experience… the AI also can disagree with me.” |
| Coding improvement | Moderate–Strong | + .175 + .213 |
| Subjectivity of AI assistant's evaluation | Strong | “I think in the practice process… actually, I trust my own perception more.” |
| Trust | Moderate | “You trained it well.” “At the beginning… it processed quite good, but later… it began to say something really silly.” |
| Interaction pattern | Moderate | coding script input; reasoning with AI about the answers to some codes |

*Table B4* Rating framework with evidence: Participant D

| **Dimension** | **Level** | **Evidence (verbatim excerpt)** |
| --- | --- | --- |
| Prior knowledge of coding | Weak | With no experience with dialogue coding |
| Prior knowledge of AI | Weak | With no experience of LLMs |
| Positionality (human-centred) | Moderate | “The sort of critical friend to go through it.” “I still coded it myself manually, I didn't rely completely on it.” |
| Coding improvement | Strong | + .315 + .210 |
| Subjectivity of an AI assistant's evaluation | Moderate | “I'd completely forgotten about the data that you gave me about how reliable it is.” |
| Trust | Moderate | “It felt a bit more authoritative… because I wasn't as familiar with the coding system.” |
| Interaction pattern | Moderate | coding script input; reasoning with AI about the answers to some codes |

*Table B5* Rating framework with evidence: Participant E

| **Dimension** | **Level** | **Evidence (verbatim excerpt)** |
| --- | --- | --- |
| Prior knowledge of coding | Weak | With no experience with dialogue coding |
| Prior knowledge of AI | Weak | With no experience of LLMs |
| Positionality (human-centred) | Weak–Moderate | “I'm not confident of the coding myself, so I shouldn't be challenging something until I'm really 100% confident myself.” |
| Coding improvement | Strong | + .151 + .280 |
| Subjectivity of AI assistant's evaluation | Weak | “Coding ability improved… to probably 65%.” |
| Trust | Strong | “It presents me with viable responses… It saves time.” “I didn't seem to agree with what AI was saying.” |
| Interaction pattern | Weak | Only coding script input |

*Table B6* Rating framework with evidence: Participant F

| **Dimension** | **Level** | **Evidence (verbatim excerpt)** |
| --- | --- | --- |
| Prior knowledge of coding | Moderate | With some experience with dialogue coding |
| Prior knowledge of AI | Moderate | Use LLMs in daily life |
| Positionality (human-centred) | Strong | “Like an author… not authority, but like a third person.” “ChatGPT is neither a person nor something that I fully rely upon.” |
| Coding improvement | Moderate | + .064 + .182 |
| Subjectivity of AI assistant's evaluation | Strong | “I was also relying so much upon my human nature.” |
| Trust | Weak | “I was not happy with the ChatGPT's code.” |
| Interaction pattern | Weak | Only coding script input |

1. Coding improvement, calculated as the average improvement across the two conditions, was classified as weak if it was below 0.1, moderate if it was between 0.1 and 0.2, and strong if it was above 0.2. [↑](#footnote-ref-1)
